# Supplementary material for: In Acute ST-Segment Elevation Myocardial Infarction, Coronary Wedge Pressure Is Associated with Infarct Size and Reperfusion Injury as Evaluated by Cardiac Magnetic Resonance Imaging
Source: Hindawi journal article supplement (doi:10.1155/2020/2863290), 2020-08-17
Supplement: f1 [file 2863290.f1.zip]

Archive with 2 entries (2 files):
- STROBE_checklist_cohort.doc
- Supplementary Material.docx
