# Supplementary material for: In Acute ST-Segment Elevation Myocardial Infarction, Coronary Wedge Pressure Is Associated with Infarct Size and Reperfusion Injury as Evaluated by Cardiac Magnetic Resonance Imaging
Source: Hindawi journal article supplement (doi:10.1155/2020/2863290), 2020-08-17
Supplement: f1 [file 2863290.f1.zip › Supplementary Material.docx]

**Cardiac magnetic resonance (CMR) imaging protocol**

Image acquisition was performed on a 1.5T scanner (Siemens Magnetom Avanto Tim) and included:

1. Cine imaging, using a steady state free precession (SSFP) pulse sequence (echo time (TE) 1.24ms; repetition time (TR) 58.6ms; flip angle 72°, spatial resolution 2.8 × 2.0 × 7.0 mm³, with ≥18 phases per cardiac cycle), covering the whole heart in parallel short axis slices. 7 mm slice thickness has been used for all sequences.
2. T2 STIR weighted imaging, using a triple-inversion recovery turbo spin echo sequence (TE 52.0 ms, TR 700, flip angle 180, spatial resolution 2.3 × 1.3 × 5.0mm). The images were acquired using the ‘3-of-5’ approach, before contrast administration.
3. Late gadolinium enhancement (LGE) images were obtained between 10 and 15 minutes following Gadolinium Chelate (0.5 mmol/kg) administration using an Inversion recovery-prepared T1-weighted gradient echo sequence. The optimal inversion time to null signal from normal myocardium was determined using a TI SCOUT sequence. 10 to 12 short axis slices were acquired with further slices in the vertical and horizontal long axis orientations, or phase-swapped, if indicated based on LGE imaging obtained. Typical parameters used: TE 3.29ms, TR 840.80ms, flip angle 25, acquired spatial resolution 2.0×1.5×8.0mm.

**Cardiac magnetic resonance image analysis**

CMR image analysis was performed using commercially available software (Circle Cardiovascular Imaging Inc., Calgary, Canada, cvi42). LGE and T2 weighted images were evaluated by two blinded CMR expert readers.

Left ventricle epicardial and endocardial borders were manually contoured at end-diastole and end-systole on the LV short axis cine stack to determine LV volumes and function.

LGE was firstly assessed visually according to the sixteen segment American Heart Association model [24]. The five standard deviation (SD) technique was used for quantifying LGE [25]. Epicardial and endocardial contours were delineated manually. Care was taken to avoid partial volume effects from the neighbouring tissue and blood pool when analysing LGE images. Two region of interest, one representing remote myocardium and one representing the infarct area were automatically detected. Microvascular obstruction (MVO), defined as a hypointense area within the infarcted zone, was planimetered manually from LGE images using the 5SD method.

The presence and extent of oedema and intramyocardial haemorrhage (IMH) was analysed from T2-weighed sequences using the 2SD method [26]. Epicardial and endocardial borders were manually delineated. Oedema was defined as voxels of >2SD above the remote myocardium. IMH was defined as an area with mean signal intensity of less than 2SD below the remote myocardium.

Infarct size, MVO, myocardial oedema, and IMH were expressed in grams and as percentage of left ventricular mass.

**References**

[24] Cerqueira MD, Weissman NJ, Dilsizian V, Jacobs AK, Kaul S, Laskey WK, et al. Standardized myocardial segmentation and nomenclature for tomographic imaging of the heart. A statement for healthcare professionals from the Cardiac Imaging Committee of the Council on Clinical Cardiology of the American Heart Association. Circulation2002;105:539-42.

[25] Bondarenko O, Beek AM, Hofman MB, Kühl HP, Twisk JW, van Dockum WG, et al. Standardizing the definition of hyperenhancement in the quantitative assessment of infarct size and myocardial viability using delayed contrast-enhanced CMR.J Cardiovasc Magn Reson 2005;7:481-5.

[26] Wright J, Adriaenssens T, Dymarkowski S, Desmet W, Bogaert J. Quantification of myocardial area at risk with T2-weighted CMR: comparison with contrast-enhanced CMR and coronary angiography.J Am Coll Cardiol Cardiovasc Img2009;2:825-31.
